# Supplementary material for: Spatial charge separation on the (110)/(102) facets of cocatalyst-free ZnIn2S4for the selective conversion of 5-hydroxymethylfurfural to 2,5-diformylfuran
Source: Royal Society of Chemistry journal article supplement (doi:10.1039/d2gc04362a), 2022-12-20
Supplement: d2gc04362a1.pdf [file d2gc04362a1.pdf]

## Supplementary information

### **Spatial Charge Separation on (110)/(102) Facets of Cocatalyst-Free ZnIn<sub>2</sub>S<sub>4</sub> for Selective Conversion of 5-Hydroxymethylfurfural to 2,5-Diformylfuran**

Heng Zhao,<sup>\*a</sup> Dhwanil Trivedi,<sup>a</sup> Morteza Roostaeinia,<sup>a</sup> Xue Yong,<sup>b</sup> Jun Chen,<sup>c</sup> Pawan Kumar,<sup>a</sup> Jing Liu,<sup>c</sup> Bao-Lian Su,<sup>c, d</sup> Steve Larter,<sup>c</sup> Md Golam Kibria,<sup>\*a</sup> Jinguang Hu<sup>\*a</sup>

<sup>a</sup> Department of Chemical and Petroleum Engineering, University of Calgary, 2500 University Drive, NW, Calgary, Alberta T2N 1N4, Canada.

<sup>b</sup> Department of Chemistry, The University of Sheffield, Western Bank, Sheffield S10 2TN, United Kingdom.

<sup>c</sup> State Key Laboratory of Advanced Technology for Materials Synthesis and Processing, Wuhan University of Technology, 122 Luoshi Road, 430070 Wuhan, Hubei, China.

<sup>d</sup> Laboratory of Inorganic Materials Chemistry (CMI), University of Namur, 61 rue de Bruxelles, B-5000 Namur, Belgium.

<sup>e</sup> Department of Geosciences, University of Calgary, 2500 University Drive, NW, Calgary, Alberta T2N 1N4, Canada.

\*Corresponding authors.

E-mail addresses: [heng.zhao1@ucalgary.ca](mailto:heng.zhao1@ucalgary.ca) (H. Zhao), [md.kibria@ucalgary.ca](mailto:md.kibria@ucalgary.ca) (M.-G. Kibria), [jinguang.hu@ucalgary.ca](mailto:jinguang.hu@ucalgary.ca) (J.-G. Hu)

## **Experimental section**

**g-C<sub>3</sub>N<sub>4</sub>:** Graphitic carbon nitride was prepared by traditional calcination method. Typically, 7.2 g melamine was put in a boat crucible which was covered by another boat crucible. Melamine was annealed at 550 °C for 2 h in Ar atmosphere with a ramp rate of 2 °C/min. The yellow sample was obtained and grounded into fine powder to get the final g-C<sub>3</sub>N<sub>4</sub> photocatalyst.

**NiTiO<sub>3</sub>:** Nickel titanate was prepared by sol-gel process. Typically, 10 mmol nickel acetate tetrahydrate was dissolved into 60 mL ethylene glycol until green and transparent solution was formed. 10 mmol titanium (IV) isopropoxide was added dropwise and the mixture was stirred for 2 h at room temperature. The precipitate was collected and washed with 70% isopropanol for three times. Then final photocatalyst was obtained after calcination at 600 °C for 2 h in air with a ramp rate of 2 °C/min.

**BiVO<sub>4</sub>:** Bismuth vanadate was prepared by chemical bath deposition method. Typically, 2 mmol Bi(NO<sub>3</sub>)<sub>3</sub>·5H<sub>2</sub>O was added into 20 ml ethylene glycol solution and stirred until a clear solution was formed, labeled as solution A. Then 2 mmol NH<sub>4</sub>VO<sub>3</sub> was added into the 20 ml deionized water and concentrated HNO<sub>3</sub> was added until transparent solution was formed as solution B. Solution B was quickly added into solution A and stirred for about 1h. The precipitate was filtered, washed with deionized water and absolute ethanol several times, and dried at 60 °C for 10 h in air. Finally, the yellow powder was calcined in air at 300 °C for 2 h to get pure BiVO<sub>4</sub> photocatalyst.

**TiO<sub>2</sub> and ZnS:** TiO<sub>2</sub> (anatase, nanopowder, <25 nm particle size, 99.7% trace metals

basis) and ZnS (powder, 10  $\mu\text{m}$ , 99.99% trace metals basis) were purchased from Millipore Sigma without further purification.

**In<sub>2</sub>S<sub>3</sub> and CdS:** Indium sulfide and cadmium sulfide were prepared by hydrothermal method. Typically, 1.0 mmol InCl<sub>3</sub>•4H<sub>2</sub>O or 1.5 mmol Cd(NO<sub>3</sub>)<sub>2</sub>•4H<sub>2</sub>O and 1.5 mmol thioacetamide were dissolved in 50 mL deionized water. The transparent solution was transferred into 80 mL Teflon-lined autoclave and kept at 180 °C for 2 h. The In<sub>2</sub>S<sub>3</sub> or CdS photocatalyst was finally obtained after washed with 70% isopropanol for three times and dried at 40 °C overnight.

**CdIn<sub>2</sub>S<sub>4</sub> and NiIn<sub>2</sub>S<sub>4</sub>:** Min<sub>2</sub>S<sub>4</sub> (M=Cd and Ni) was prepared in the same procedure as ZnIn<sub>2</sub>S<sub>4</sub>. The only difference was the change of precursor of 0.5 mmol ZnCl<sub>2</sub> to 0.5 mmol Cd(NO<sub>3</sub>)<sub>2</sub>•4H<sub>2</sub>O or 0.5 mmol Ni(NO<sub>3</sub>)<sub>2</sub>•6H<sub>2</sub>O.

## Supporting Figures

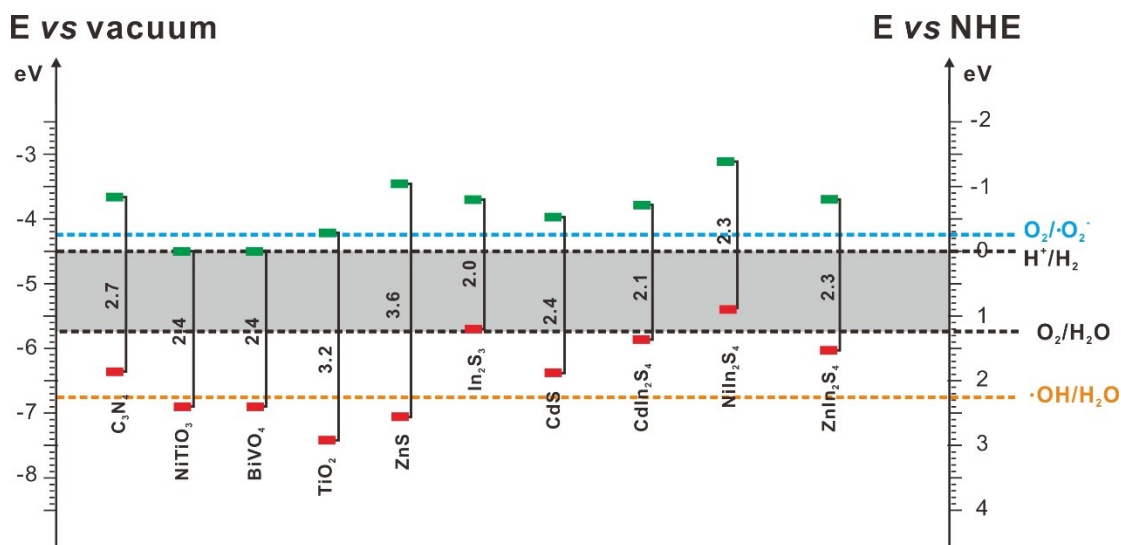

**Fig. S1.** Band gap structures of different photocatalysts used in this work.

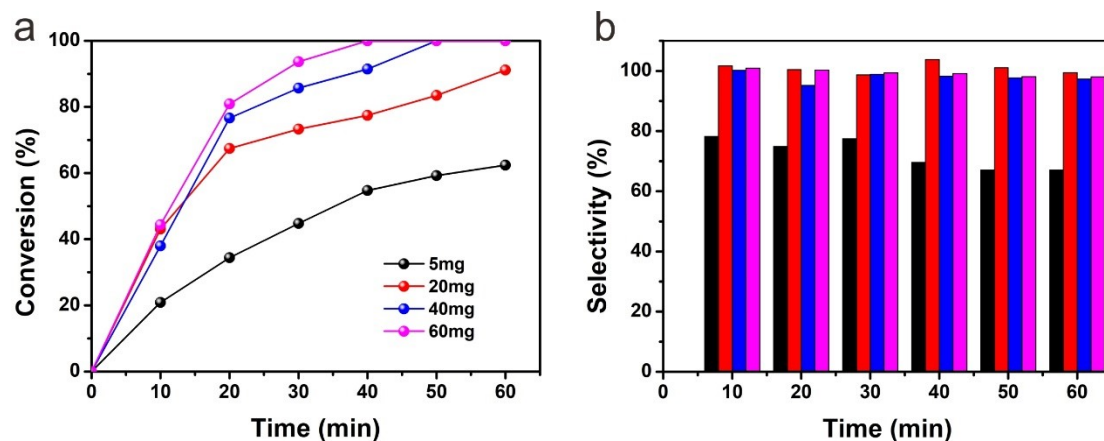

**Fig. S2.** The effect of catalyst loading on (a) HMF conversion and (b) DFF selectivity.

Reaction condition: 5 mM HMF, 10 mL CH<sub>3</sub>CN, O<sub>2</sub>, simulated solar light.

Higher photocatalyst loading exhibited higher HMF conversion rate. For the cases of 40 mg and 60 mg of ZnIn<sub>2</sub>S<sub>4</sub>, all the 5 mM HMF was completely converted within 50 min and 40 min with almost 100% DFF selectivity respectively. While 5 mg of ZnIn<sub>2</sub>S<sub>4</sub> only showed ~60% HMF conversion with ~65% DFF selectivity. Herein, 20 mg of ZnIn<sub>2</sub>S<sub>4</sub> was chose as the optimized photocatalyst loading.

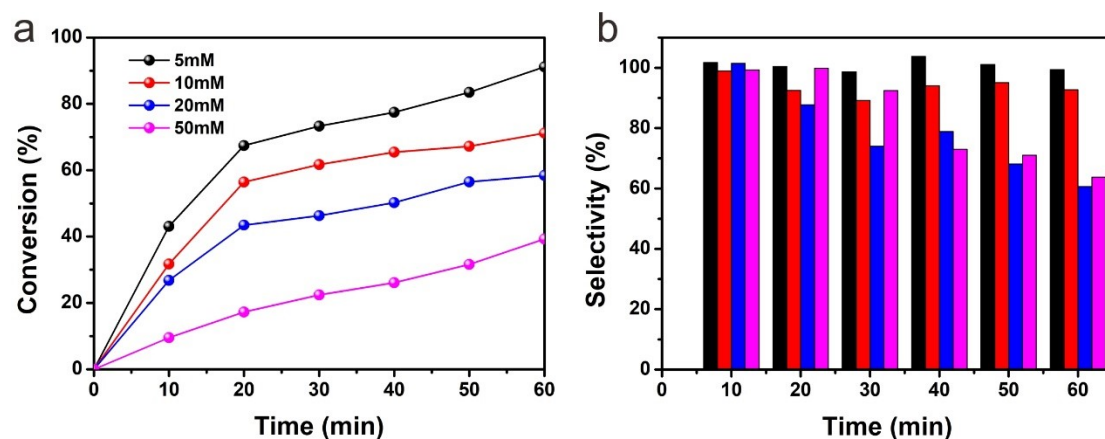

**Fig. S3.** The effect of HMF concentration on (a) HMF conversion and (b) DFF selectivity. Reaction condition: 20 mg  $\text{ZnIn}_2\text{S}_4$ , 10 mL  $\text{CH}_3\text{CN}$ ,  $\text{O}_2$ , simulated solar light.

20 mg  $\text{ZnIn}_2\text{S}_4$  showed lower HMF conversion and lower DFF selectivity when the concentration of HMF increased. Herein, 5 mM of HMF was finally chose as the optimized substrate concentration.

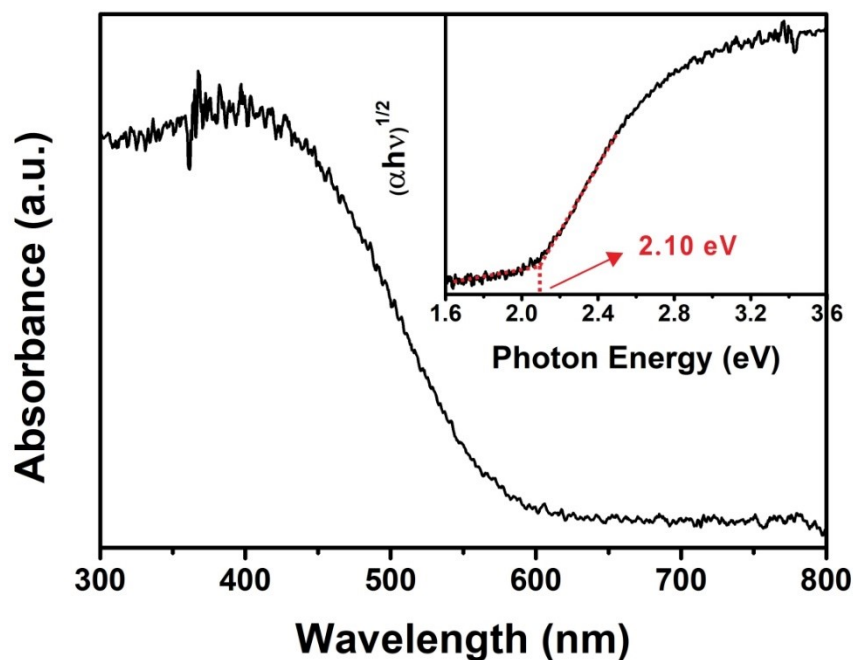

**Fig. S4.** Light absorption spectrum and corresponding Tauc plots of  $(\alpha h\nu)^{1/2}$  versus photon energy ( $h\nu$ ).

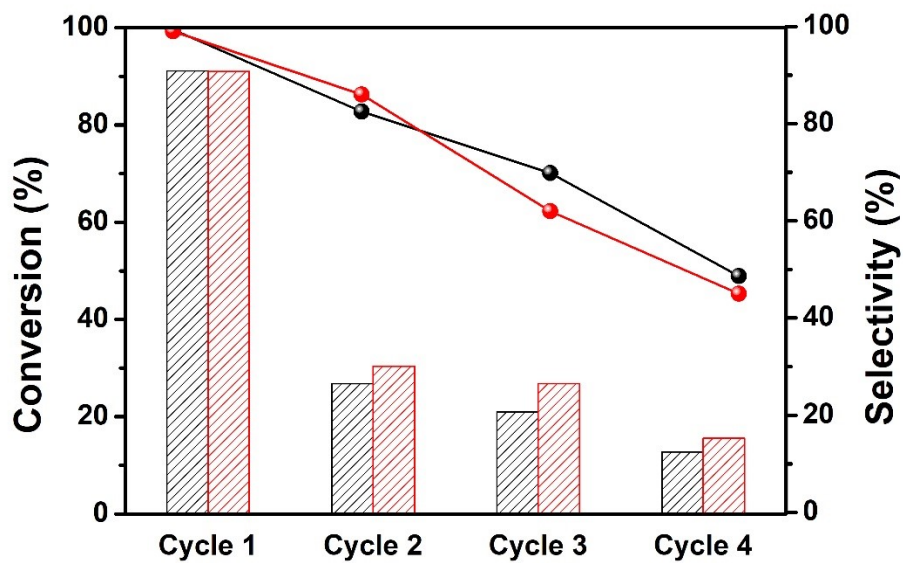

**Fig. S5.** Cycling tests of  $\text{ZnIn}_2\text{S}_4$  for HMF conversion (histograms) and DFF selectivity (dotted lines) under simulated solar light (black color) and visible light (red color).

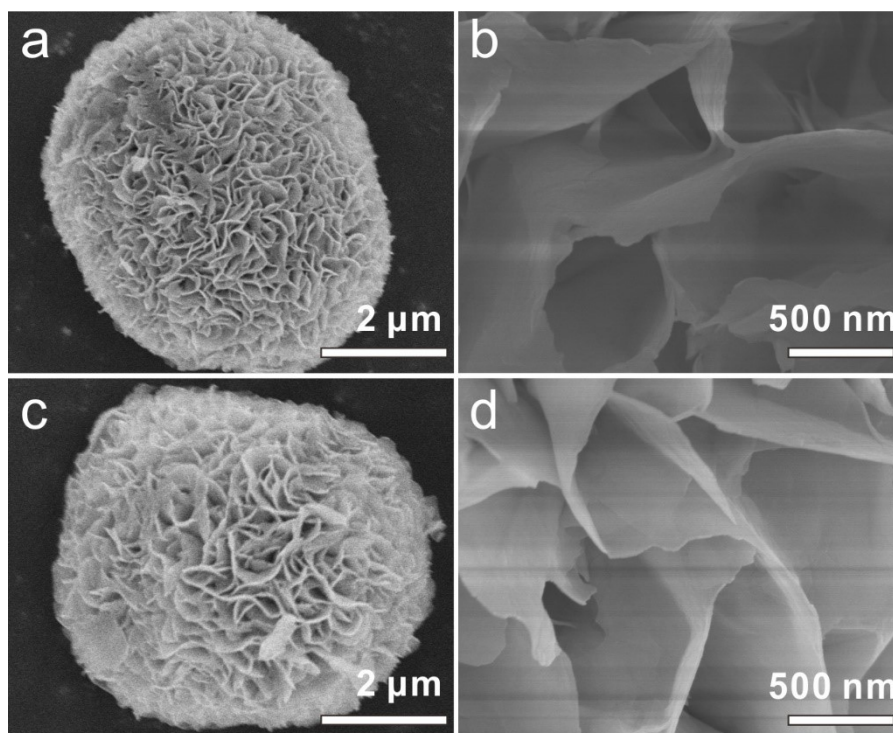

**Fig. S6.** SEM images of  $\text{ZnIn}_2\text{S}_4$  before (a, b) and after (c, d) photocatalytic reaction.

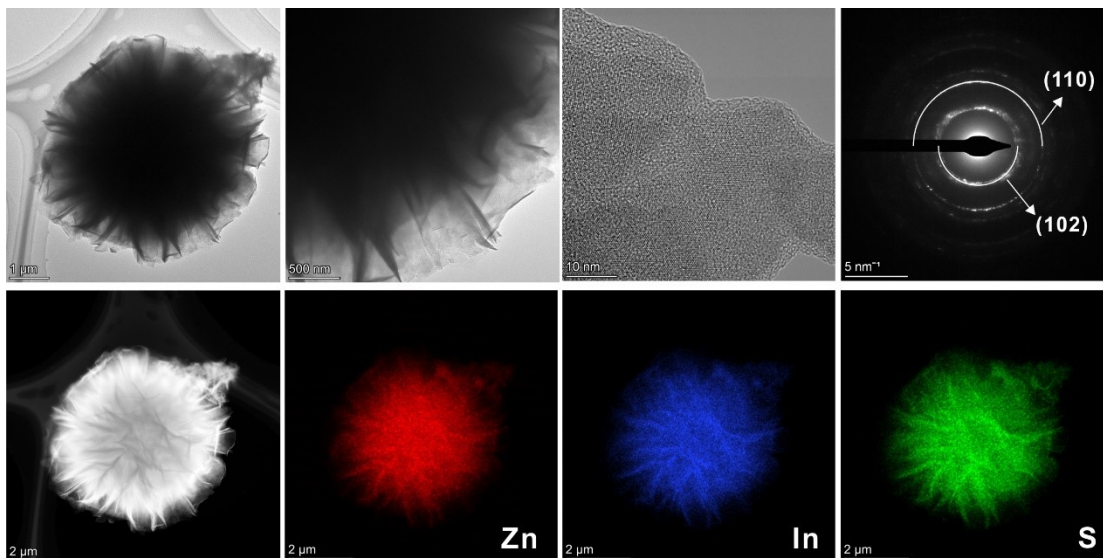

**Fig. S7.** TEM images in low and high resolutions along with SAED and elemental mappings of the as-fabricated  $\text{ZnIn}_2\text{S}_4$ .

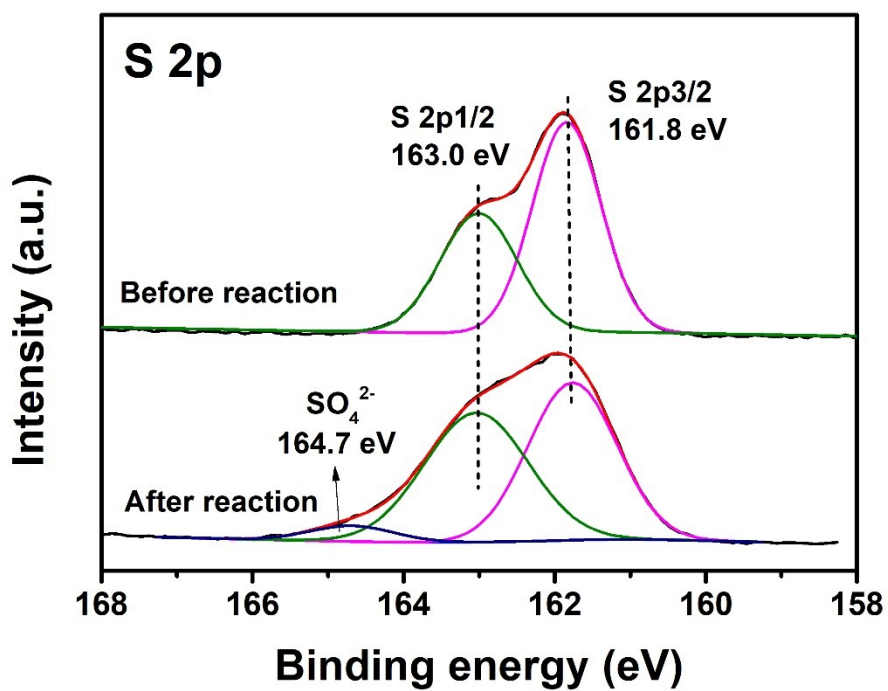

**Fig. S8.** High resolution XPS spectra of S 2p of  $\text{ZnIn}_2\text{S}_4$  before and after photocatalytic reaction.

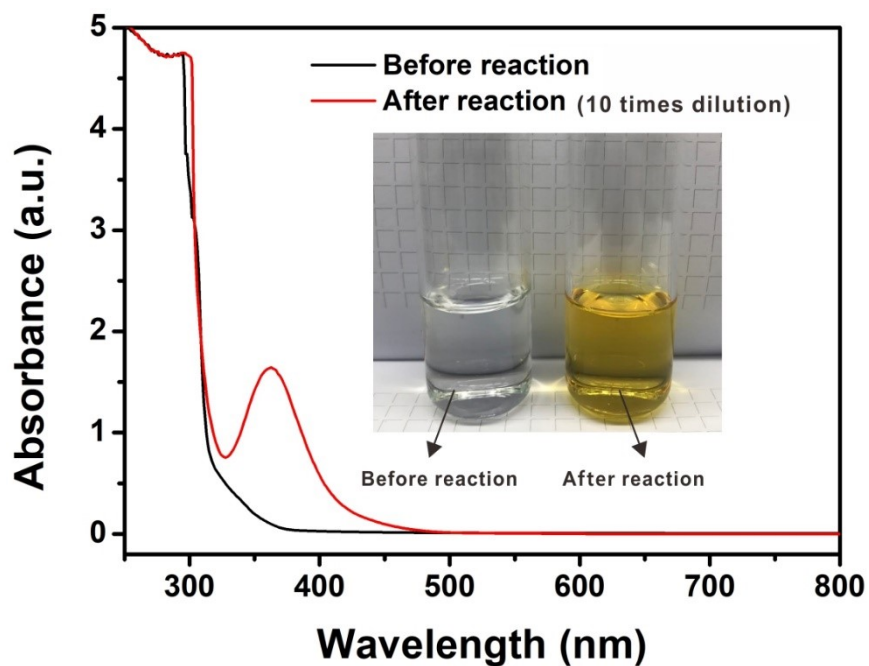

**Fig. S9.** Light absorption of the solution before and after photocatalytic reaction with addition of excess KI to detect the produced  $\text{H}_2\text{O}_2$ . Inset is the corresponding photograph.

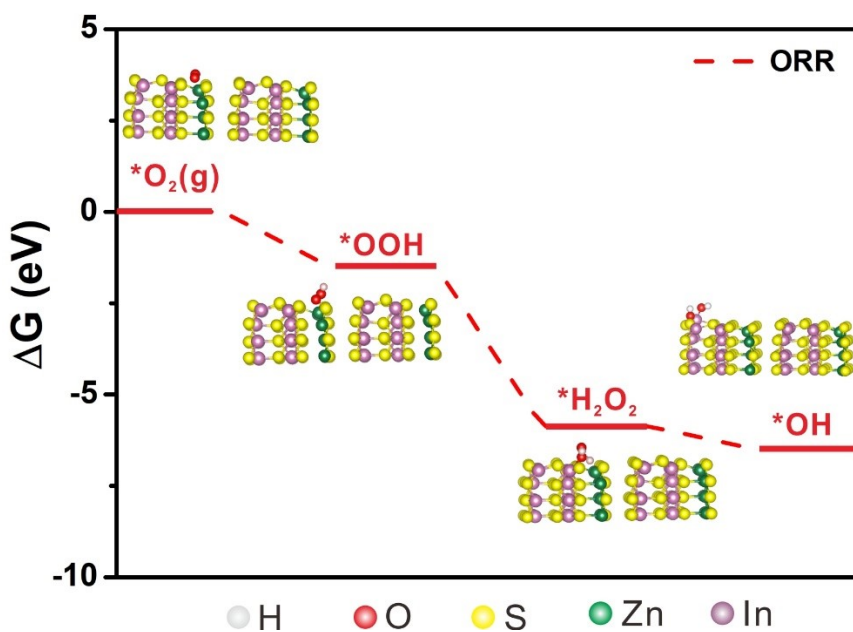

**Fig. S10.** Reaction energy profiles of  $\text{O}_2$  reduction reaction on (110) crystal facet.



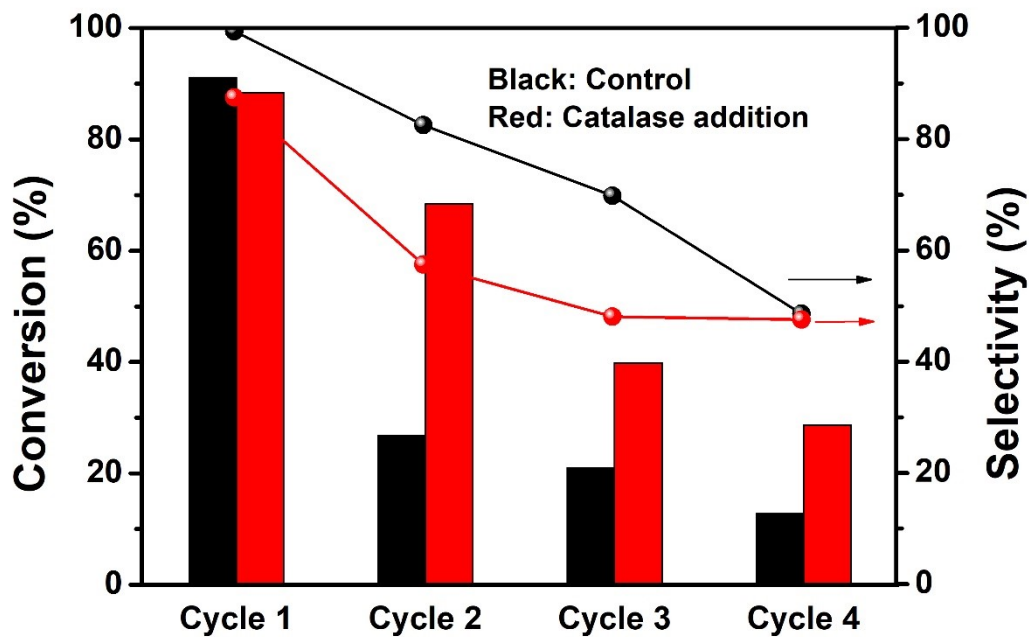

**Fig. S11.** Comparison of  $\text{ZnIn}_2\text{S}_4$  for HMF conversion (histograms) and DFF selectivity (dotted lines) between control experiment (black color) and the one with catalase (red color).

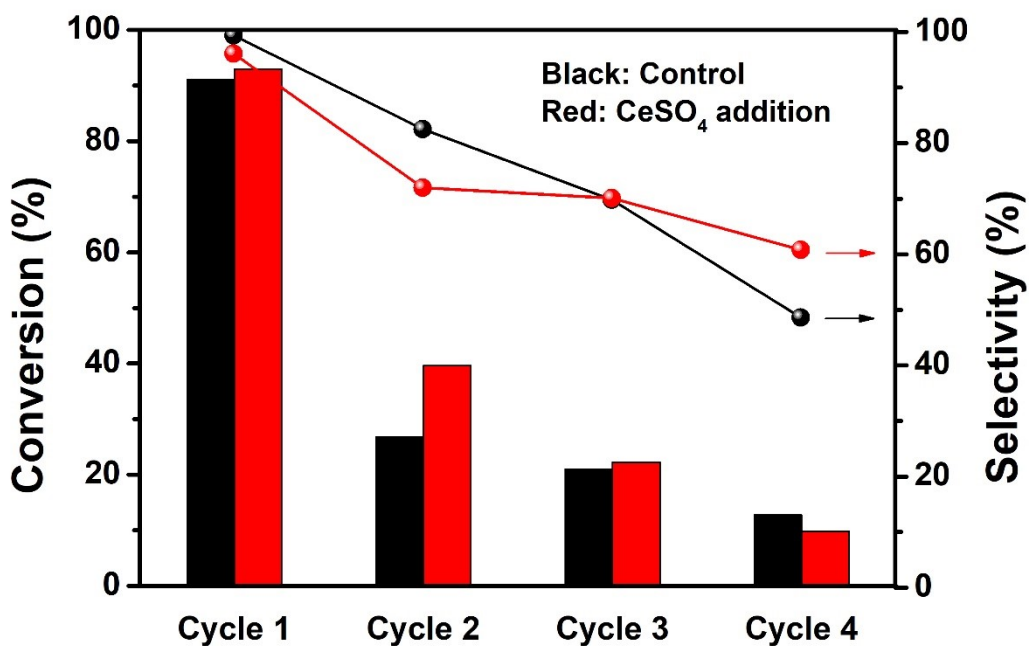

**Fig. S12.** Comparison of  $\text{ZnIn}_2\text{S}_4$  for HMF conversion (histograms) and DFF selectivity (dotted lines) between control experiment (black color) and the one with  $\text{CeSO}_4$  (red color).

## Supporting tables

**Table S1.** Comparison of literatures on HMF to DFF by photocatalysis.

| Photocatalyst                                          | Solvent                                | HMF<br>(mM) | Tim<br>e (h) | Conv.<br>(%) | Sel.<br>(%) | yield<br>(%) | Ref.      |
|--------------------------------------------------------|----------------------------------------|-------------|--------------|--------------|-------------|--------------|-----------|
| ZnIn <sub>2</sub> S <sub>4</sub>                       | MeCN                                   | 5           | 1            | 91.1         | 99.4        | 90.6         | This work |
| MAPbBr <sub>3</sub>                                    | MeCN                                   | 5           | 10           | 100          | 90          | 90           | 1         |
| CdS                                                    | MeCN/Mn(NO <sub>3</sub> ) <sub>2</sub> | 25          | 48           | 99           | 99          | 99           | 2         |
| SGH-TiO <sub>2</sub>                                   | MeCN                                   | 1           | 0.5          | 59           | 87          | 52           | 3         |
| Fe(III)-Bi <sub>2</sub> MoO <sub>6</sub>               | Water                                  | 20          | 8            | 32.6         | 95.3        | 31.1         | 4         |
| WO <sub>3</sub> /g-C <sub>3</sub> N <sub>4</sub>       | MeCN/PhCF <sub>3</sub>                 | 0.1         | 6            | 48.3         | 67.7        | 32.7         | 5         |
| P-Zn <sub>x</sub> Cd <sub>1-x</sub> S                  | Water                                  | 16          | 8            | 40           | 65          | 26           | 6         |
| Zn <sub>0.5</sub> Cd <sub>0.5</sub> S/MnO <sub>2</sub> | Water                                  | 16          | 24           | 46.6         | 100         | 46.6         | 7         |
| Nb <sub>2</sub> O <sub>5</sub>                         | PhCF <sub>3</sub>                      | 0.1         | 6            | 19.2         | 90.6        | 17.4         | 8         |
| Au-Ru/rGO                                              | Toluene                                | 50          | 8            | 95.7         | 95          | 90.9         | 9         |

**Table S2.** The intensity ratio of three major XRD diffraction peaks of ZnIn<sub>2</sub>S<sub>4</sub> before and after cycling reactions.

| Photocatalyst                        | I <sub>(006)</sub> | I <sub>(102)</sub> | I <sub>(110)</sub> | I <sub>(102)/I<sub>(006)</sub></sub> | I <sub>(110)/I<sub>(006)</sub></sub> | I <sub>(110)/I<sub>(102)</sub></sub> |
|--------------------------------------|--------------------|--------------------|--------------------|--------------------------------------|--------------------------------------|--------------------------------------|
| ZnIn <sub>2</sub> S <sub>4</sub>     | 244                | 386                | 457                | 1.58                                 | 1.87                                 | 1.18                                 |
| ZnIn <sub>2</sub> S <sub>4</sub> -C1 | 212                | 692                | 468                | 3.26                                 | 2.11                                 | 0.68                                 |
| ZnIn <sub>2</sub> S <sub>4</sub> -C2 | 140                | 461                | 300                | 3.29                                 | 2.24                                 | 0.65                                 |
| ZnIn <sub>2</sub> S <sub>4</sub> -C3 | 210                | 626                | 384                | 2.98                                 | 1.83                                 | 0.61                                 |

## References

1. M. Zhang, Z. Li, X. Xin, J. H. Zhang, Y. Q. Feng and H. J. Lv, *ACS Catal.*, 2020,

- 10**, 14793-14800.
2. J. L. DiMeglio, A. G. Breuhaus-Alvarez, S. Q. Li and B. M. Bartlett, *ACS Catal.*, 2019, **9**, 5732-5741.
  3. A. Khan, M. Goepel, A. Kubas, D. Lomot, W. Lisowski, D. Lisovytskiy, A. Nowicka, J. C. Colmenares and R. Glaser, *ChemSusChem*, 2021, **14**, 1351-1362.
  4. J. J. Xue, C. J. Huang, Y. Q. Zong, J. D. Gu, M. X. Wang and S. S. Ma, *Appl. Organomet. Chem.*, 2019, **33**, e5187.
  5. H. L. Zhang, Z. Y. Feng, Y. K. Zhu, Y. Wu and T. H. Wu, *J. Photoch. Photobio. A*, 2019, **371**, 1-9.
  6. H. F. Ye, R. Shi, X. Yang, W. F. Fu and Y. Chen, *Appl. Catal. B-Environ.*, 2018, **233**, 70-79.
  7. S. Dhingra, T. Chhabra, V. Krishnan and C. M. Nagaraja, *ACS Appl. Energ. Mater.*, 2020, **3**, 7138-7148.
  8. H. L. Zhang, Q. Wu, C. Guo, Y. Wu and T. H. Wu, *Acs Sustainable Chemistry & Engineering*, 2017, **5**, 3517-3523.
  9. B. Ma, Y. Y. Wang, X. N. Guo, X. L. Tong, C. Liu, Y. W. Wang and X. Y. Guo, *Appl. Catal. A-Gen.*, 2018, **552**, 70-76.
